# Supplementary material
Source: HighWire-hosted journal article supplement (https://www.cmaj.ca/highwire/filestream/59207/field_highwire_adjunct_files/0/five-delirium-1-at.pdf)
Supplement: five-delirium-1-at.pdf [file five-delirium-1-at.pdf]

## Appendix 1: References

1. Inouye SK, Westendorp RG, Saczynski JS. Delirium in elderly people. *Lancet* 2014;383:911-22.
2. Hosie A, Davidson PM, Agar M, et al. Delirium prevalence, incidence and implications for screening in specialist palliative care inpatient settings: a systematic review. *Palliat Med* 2013;27:486-98.
3. Lawlor PG, Bush SH. Delirium in patients with cancer: assessment, impact, mechanisms and management. *Nat Rev Clin Oncol* 2014 Sept. 2. [Epub ahead of print]
4. Inouye SK, van Dyck CH, Alessi CA, et al. Clarifying confusion: the confusion assessment method. A new method for detection of delirium. *Ann Intern Med* 1990;113:941-8.
5. Marcantonio ER, Ngo LH, O'Connor M, et al. 3D-CAM: Derivation and validation of a 3-minute diagnostic interview for CAM-defined delirium: A cross-sectional diagnostic test study. *Ann Intern Med* 2014;161:554-61.
6. The Hospital Elder Life Program for Prevention of Delirium. 2014. Available [www.hospitalelderlifeprogram.org/](http://www.hospitalelderlifeprogram.org/) (accessed 2014 Nov. 28).
7. Young J, Murthy L, Westby M, et al. Diagnosis, prevention, and management of delirium: summary of NICE guidance. *BMJ* 2010;341:c3704.
8. Dasgupta M, Brymer C. Prognosis of delirium in hospitalized elderly: worse than we thought. *Int J Geriatr Psychiatry* 2014;29:497-505.
